# Supplementary material
Source: PubMed Central journal article supplement (PMC2765255)

## Supporting Information

# Phosphonosulfonates Are Potent, Selective Inhibitors of Dehydrosqualene Synthase and Staphyloxanthin Biosynthesis in *Staphylococcus aureus*

By

Yongcheng Song<sup>†</sup>, Fu-Yang Lin<sup>¶</sup>, Fenglin Yin<sup>¶</sup>, Mary Hensler<sup>‡</sup>, Carlos A. Rodríguez Poveda<sup>§</sup>, Dushyant Mukkamala<sup>¶</sup>, Rong Cao<sup>¶</sup>, Hong Wang<sup>¥</sup>, Craig T. Morita<sup>¥</sup>, Dolores González Pacanowska<sup>§</sup>, Victor Nizet<sup>‡</sup> and Eric Oldfield<sup>†¶\*</sup>

<sup>†</sup>*Department of Chemistry, University of Illinois at Urbana-Champaign, 600 South Mathews Avenue, Urbana, IL 61801;* <sup>¶</sup>*Center for Biophysics and Computational Biology, 607 South Mathews Avenue, University of Illinois at Urbana-Champaign, Urbana, IL 61801;* <sup>‡</sup>*Department of Pediatrics and Skaggs School of Pharmacy & Pharmaceutical Sciences, University of California, San Diego, 9500 Gilman Drive, La Jolla, CA 92093-0687;* <sup>§</sup>*Instituto de Parasitología y Biomedicina López-Neyra, Consejo Superior de Investigaciones Científicas, Granada, Spain;* <sup>¥</sup>*Division of Rheumatology, Department of Internal Medicine, EMRB 400F, University of Iowa Carver College of Medicine, Iowa City, IA 52242*

\*Corresponding author: Phone, 217-333-3374; Fax, 217-244-0997; email, eo@chad.scs.uiuc.edu

---

### Table of Contents:

|           |         |
|-----------|---------|
| Table S1  | Page S2 |
| Table S2  | Page S4 |
| Figure S1 | Page S5 |

---

**Table S1.** Top ten “enzyme plus 2-descriptor” combinations with their coefficients and relative contributions for the *S. aureus* cell pIC<sub>50</sub> predictions.

| <i>S. aureus</i> (CrtM)<br>pIC <sub>50</sub> (cell) =                          | R <sup>2</sup> | Relative Importance<br>of pIC <sub>50</sub> (enzyme) | Relative Importance<br>of Descriptor B <sup>a</sup> | Relative Importance<br>of Descriptor C <sup>a</sup> |
|--------------------------------------------------------------------------------|----------------|------------------------------------------------------|-----------------------------------------------------|-----------------------------------------------------|
| 1.07935<br>+1.07168 * crtm_new<br>+0.01232 * PEOE_VSA-1<br>+0.38370 * E_stb    | 0.71715        | 1.000000                                             | 0.498511                                            | 0.929362                                            |
| -0.51520<br>+0.93203 * crtm_new<br>+0.01378 * vsa_hyd<br>+0.27786 * E_stb      | 0.70532        | 1.000000                                             | 0.489720                                            | 0.773848                                            |
| 0.88476<br>+0.86354 * crtm_new<br>-0.46499 * logS<br>+0.24843 * E_stb          | 0.70334        | 1.000000                                             | 0.533638                                            | 0.746758                                            |
| -1.83200<br>+0.93216 * crtm_new<br>+0.01654 * PEOE_VSA_NEG<br>+0.26955 * E_stb | 0.70285        | 1.000000                                             | 0.486128                                            | 0.750599                                            |
| 1.32345<br>+0.89953 * crtm_new<br>+0.52931 * logP(o/w)<br>+0.24326 * E_stb     | 0.70124        | 1.000000                                             | 0.509204                                            | 0.701953                                            |
| 0.66970<br>+0.94974 * crtm_new<br>+0.00704 * E_sol<br>+0.01894 * PEOE_VSA_NEG  | 0.69410        | 1.000000                                             | 0.734455                                            | 0.546206                                            |
| -2.44204<br>+0.91088 * crtm_new<br>+0.02328 * PEOE_VSA_NEG<br>-0.24100 * E_str | 0.69302        | 1.000000                                             | 0.700314                                            | 0.762682                                            |
| -2.28190<br>+0.90675 * crtm_new<br>+0.00778 * ASA<br>+0.25558 * E_stb          | 0.69268        | 1.000000                                             | 0.484585                                            | 0.731641                                            |
| -0.53109<br>+0.90728 * crtm_new<br>+0.01936 * vsa_hyd<br>-0.24937 * E_str      | 0.69117        | 1.000000                                             | 0.706822                                            | 0.792306                                            |
| -0.50061<br>+1.01675 * crtm_new<br>+0.34050 * chi1_C<br>+0.29099 * E_stb       | 0.68972        | 1.000000                                             | 0.429537                                            | 0.742886                                            |

<sup>a</sup> The cell activity data (pED<sub>50</sub>) was fitted to the CrtM inhibition data using the following “enzyme plus 2-descriptor” equation:

$$\text{pED}_{50}(\text{cell}) = a \cdot \text{pIC}_{50}(\text{CrtM}) + b \cdot B + c \cdot C + d$$

where B, C are all non-Boolean (non-0 or non-1) descriptors computed in MOE. There were 117 such descriptors and all pairwise combinations were used to predict pED<sub>50</sub>(cell). The 10 combinations having the highest R<sup>2</sup> value are shown in the Table. The highest training set R<sup>2</sup> value was R<sup>2</sup> = 0.72 which yielded a R<sup>2</sup> = 0.62 for a leave-2-out test set calculation. Using scrambled cell pIC<sub>50</sub> data there was essentially no predictivity, R<sup>2</sup> = 0.10.

Table S2. Elemental analysis results of compounds.

| compound      | required<br>C | required<br>H | required<br>N | found<br>C | found<br>H | found<br>N |
|---------------|---------------|---------------|---------------|------------|------------|------------|
| <b>1</b>      | 30.57         | 2.73          |               | 30.5       | 2.53       |            |
| (R)- <b>1</b> | 22.63         | 1.9           |               | 22.49      | 2.16       |            |
| (S)- <b>1</b> | 26.08         | 2.6           |               | 26.07      | 2.56       |            |
| <b>3</b>      | 38.35         | 3.6           |               | 38.357     | 3.55       |            |
| <b>4</b>      | 27.31         | 2.97          |               | 27.14      | 3.26       |            |
| <b>5</b>      | 35.22         | 3.33          |               | 35.45      | 3.39       |            |
| <b>6</b>      | 27.55         | 2.68          |               | 27.79      | 2.42       |            |
| <b>7</b>      | 34.28         | 3.05          |               | 34.28      | 3.21       |            |
| <b>8</b>      | 41.68         | 4.56          |               | 41.7       | 4.23       |            |
| <b>9</b>      | 24.57         | 2.06          |               | 24.8       | 1.98       |            |
| <b>10</b>     | 35.44         | 3.33          |               | 35.4       | 3.49       |            |
| <b>11</b>     | 22.31         | 1.98          |               | 22.07      | 1.92       |            |
| <b>12</b>     | 27.49         | 2.77          |               | 27.23      | 2.71       |            |
| <b>13</b>     | 38.07         | 4.2           |               | 38.2       | 4.14       |            |
| <b>14</b>     | 37.05         | 3.5           |               | 36.9       | 3.5        |            |
| <b>15</b>     | 36.71         | 3.28          |               | 36.96      | 3.52       |            |
| <b>16</b>     | 29.76         | 3.12          | 2.17          | 29.99      | 3.1        | 2.24       |
| <b>17</b>     | 37.37         | 3.69          |               | 37.16      | 3.82       |            |
| <b>18</b>     | 38.39         | 3.22          |               | 38.12      | 3.56       |            |
| <b>19</b>     | 40.92         | 4.16          | 2.51          | 41.17      | 4.36       | 2.85       |
| <b>20</b>     | 28.15         | 2.95          |               | 28.05      | 2.63       |            |
| <b>21</b>     | 34.09         | 3.58          |               | 34.2       | 3.36       |            |
| <b>22</b>     | 35.91         | 2.66          |               | 35.87      | 2.95       |            |
| <b>24</b>     | 37.2          | 3.64          |               | 37.281     | 3.669      |            |
| <b>25</b>     | 45.67         | 5.14          |               | 45.63      | 4.93       |            |
| <b>26</b>     | 45.38         | 3.97          |               | 45.55      | 4.06       |            |
| <b>27</b>     | 18.36         | 2.12          |               | 18.3       | 1.91       |            |
| <b>28</b>     | 38.9          | 3.41          |               | 38.82      | 3.38       |            |
| <b>29</b>     | 28.88         | 2.54          |               | 29.08      | 2.74       |            |
| <b>30</b>     | 33.77         | 3.67          |               | 33.96      | 3.71       |            |
| <b>31</b>     | 31.58         | 3.59          |               | 31.686     | 3.415      |            |
| <b>32</b>     | 37.49         | 3.5           |               | 37.5       | 3.27       |            |
| <b>33</b>     | 34.65         | 2.91          |               | 34.79      | 2.89       |            |
| <b>34</b>     | 29.45         | 2.74          |               | 29.85      | 2.91       |            |
| <b>35</b>     | 32.88         | 2.76          |               | 32.89      | 2.85       |            |
| <b>36</b>     | 32.29         | 3.35          |               | 32.38      | 3.51       |            |

Figure S1. Representative dose-response curves of the staphyloxanthin inhibition in *S. aureus*.

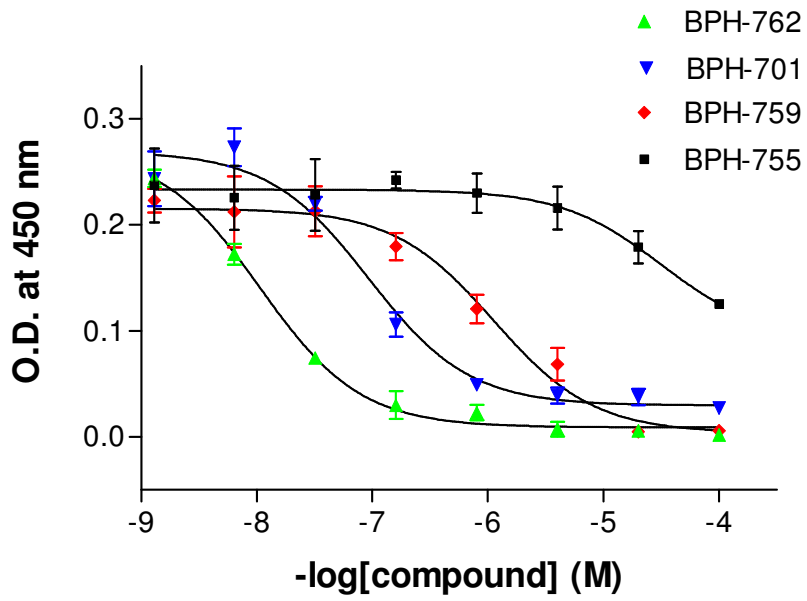

Supplement: NIHMS134695-supplement-Suppl_Data.pdf [file NIHMS134695-supplement-Suppl_Data.pdf]
